# Supplementary material
Source: MDPI journal article supplement (https://www.mdpi.com/2073-445X/12/2/356)
Supplement: s1 [file s1]

**Table S1.** List of plant species found in the Apennines dry grasslands (EU habitat type 6510) of the study area. Number of plants (N) and number of “pollination units” (PU) per species is reported.

| Plant species |                                                | N            | PU           |
|---------------|------------------------------------------------|--------------|--------------|
| 1             | <i>Achillea millefolium</i> L.                 | 15           | 15           |
| 2             | <i>Anacamptis pyramidalis</i> (L.) Rich.       | 1            | 1            |
| 3             | <i>Bellis perennis</i> L.                      | 17           | 17           |
| 4             | <i>Campanula rapunculus</i> L.                 | 16           | 60           |
| 5             | <i>Carum carvi</i> L.                          | 42           | 42           |
| 6             | <i>Convolvulus arvensis</i> L.                 | 35           | 35           |
| 7             | <i>Daucus carota</i> L.                        | 15           | 15           |
| 8             | <i>Galium mollugo</i> L.                       | 20           | 116          |
| 9             | <i>Galium verum</i> L.                         | 390          | 390          |
| 10            | <i>Hypericum perforatum</i> L.                 | 1            | 4            |
| 11            | <i>Knautia</i> sp.                             | 116          | 105          |
| 12            | <i>Leucanthemum vulgare</i> Lam.               | 633          | 633          |
| 13            | <i>Loncomelos brevistylum</i> (Wolfn.) Dostál. | 7            | 17           |
| 14            | <i>Lotus corniculatus</i> L.                   | 1395         | 4642         |
| 15            | <i>Medicago lupulina</i> L.                    | 19           | 19           |
| 16            | <i>Medicago sativa</i> L.                      | 3            | 4            |
| 17            | <i>Myosotis sylvatica</i> Hoffm.               | 62           | 60           |
| 18            | <i>Onobrychis viciifolia</i> Scop.             | 551          | 551          |
| 19            | <i>Plantago media</i> L.                       | 20           | 17           |
| 20            | <i>Polygala</i> sp.                            | 74           | 300          |
| 21            | <i>Potentilla reptans</i> L.                   | 3            | 5            |
| 22            | <i>Ranunculus acris</i> L.                     | 57           | 70           |
| 23            | <i>Rhinanthus alectorolophus</i> L.            | 3680         | 4228         |
| 24            | <i>Salvia nemorosa</i> L.                      | 6            | 96           |
| 25            | <i>Sedum acre</i> L.                           | 31           | 72           |
| 26            | <i>Silene vulgaris</i> (Moench) Garcke         | 12           | 7            |
| 27            | <i>Thymus</i> sp.                              | 15           | 46           |
| 28            | <i>Tragopogon pratensis</i> L.                 | 5            | 5            |
| 29            | <i>Trifolium pratense</i> L.                   | 2433         | 2433         |
| 30            | <i>Trifolium repens</i> L.                     | 923          | 923          |
| 31            | <i>Valeriana officinalis</i> L.                | 36           | 36           |
| <b>Total</b>  |                                                | <b>10633</b> | <b>14964</b> |

**Table S2.** List of the Apennines dry grasslands (EU habitat type 6510) pollinator species and morpho-species found interacting with plants during the sampling season. The number of plant species contacted by each pollinator is also reported.

| Pollinator species |             |               |                                  | N contacts | N plant species |
|--------------------|-------------|---------------|----------------------------------|------------|-----------------|
|                    | Order       | Family        | Species                          |            |                 |
| 1                  | Lepidoptera | Adelidae      | <i>Adelidae sp</i>               | 1          | 1               |
| 2                  | Coleoptera  | Cerambycidae  | <i>Anastrangalia sp.</i>         | 1          | 1               |
| 3                  | Hymenoptera | Apidae        | <i>Andrena sp.</i>               | 15         | 4               |
| 4                  | Coleoptera  | Buprestidae   | <i>Anthaxia hungarica</i>        | 1          | 1               |
| 5                  | Coleoptera  | Dermestidae   | <i>Anthrenus sp.</i>             | 1          | 1               |
| 6                  | Hymenoptera | Apidae        | <i>Apidae sp1</i>                | 2          | 2               |
| 7                  | Hymenoptera | Apidae        | <i>Apidae sp2</i>                | 2          | 1               |
| 8                  | Hymenoptera | Apidae        | <i>Apidae sp3</i>                | 7          | 2               |
| 9                  | Hymenoptera | Apidae        | <i>Apis mellifera</i>            | 409        | 11              |
| 10                 | Lepidoptera | Nymphalidae   | <i>Argynnis paphia</i>           | 1          | 1               |
| 11                 | Hymenoptera | Apidae        | <i>Bombus humilis</i>            | 7          | 1               |
| 12                 | Hymenoptera | Apidae        | <i>Bombus lapidarius</i>         | 67         | 5               |
| 13                 | Hymenoptera | Apidae        | <i>Bombus pascuorum</i>          | 62         | 6               |
| 14                 | Hymenoptera | Apidae        | <i>Bombus sp.</i>                | 26         | 6               |
| 15                 | Hymenoptera | Apidae        | <i>Bombus terrestris</i>         | 8          | 4               |
| 16                 | Diptera     | Bombyliidae   | <i>Bombylella atra</i>           | 38         | 10              |
| 17                 | Diptera     | Bombyliidae   | <i>Bombyliidae sp2</i>           | 1          | 1               |
| 18                 | Diptera     | Bombyliidae   | <i>Bombyliidae sp3</i>           | 3          | 1               |
| 19                 | Diptera     | Bombyliidae   | <i>Bombyliidae sp4</i>           | 2          | 1               |
| 20                 | Diptera     | Bombyliidae   | <i>Bombylius fimbriatus</i>      | 1          | 1               |
| 21                 | Diptera     | Bombyliidae   | <i>Bombylius major</i>           | 2          | 2               |
| 22                 | Coleoptera  | Cantharidae   | <i>Cantharis sp.</i>             | 2          | 2               |
| 23                 | Hymenoptera | Apidae        | <i>Ceratina sp.</i>              | 1          | 1               |
| 24                 | Coleoptera  | Chrysomelidae | <i>Chrysolina rossia</i>         | 1          | 1               |
| 25                 | Diptera     | Syrphidae     | <i>Chrysotoxum bicinctum</i>     | 1          | 1               |
| 26                 | Coleoptera  | Coccinellidae | <i>Coccinella septempunctata</i> | 5          | 3               |
| 27                 | Lepidoptera | Nymphalidae   | <i>Coenonympha pamphilus</i>     | 1          | 1               |
| 28                 | Coleoptera  | Chrysomelidae | <i>Cryptocephalus sp.</i>        | 10         | 3               |
| 29                 | Diptera     | Indeterminata | <i>Diptera sp1</i>               | 21         | 1               |
| 30                 | Diptera     | Indeterminata | <i>Diptera sp2</i>               | 2          | 1               |
| 31                 | Diptera     | Indeterminata | <i>Diptera sp3</i>               | 3          | 1               |
| 32                 | Diptera     | Indeterminata | <i>Diptera sp4</i>               | 1          | 1               |
| 33                 | Diptera     | Syrphidae     | <i>Eristalis sp.</i>             | 5          | 4               |
| 34                 | Diptera     | Syrphidae     | <i>Eristalis tenax</i>           | 1          | 1               |
| 35                 | Hymenoptera | Apidae        | <i>Eucera sp.</i>                | 2          | 1               |
| 36                 | Lepidoptera | Erebidae      | <i>Euclidia glyphica</i>         | 1          | 1               |
| 37                 | Diptera     | Syrphidae     | <i>Eupeodes sp.</i>              | 3          | 1               |
| 38                 | Lepidoptera | Riodinidae    | <i>Hamearis lucina</i>           | 1          | 1               |
| 39                 | Lepidoptera | Hesperiidae   | <i>Hesperia comma</i>            | 3          | 2               |
| 40                 | Hymenoptera | Indeterminata | <i>Hymenoptera sp1</i>           | 4          | 1               |
| 41                 | Hymenoptera | Indeterminata | <i>Hymenoptera sp2</i>           | 7          | 1               |

|              |             |               |                                 |            |           |
|--------------|-------------|---------------|---------------------------------|------------|-----------|
| 42           | Hymenoptera | Indeterminata | Hymenoptera <i>sp4</i>          | 6          | 1         |
| 43           | Hymenoptera | Indeterminata | Hymenoptera <i>sp5</i>          | 1          | 1         |
| 44           | Hymenoptera | Indeterminata | Hymenoptera <i>sp6</i>          | 12         | 3         |
| 45           | Hymenoptera | Apidae        | <i>Lasioglossum sp.</i>         | 2          | 1         |
| 46           | Lepidoptera | Sphingidae    | <i>Macroglossum stellatarum</i> | 1          | 1         |
| 47           | Lepidoptera | Nymphalidae   | <i>Maniola jurtina</i>          | 7          | 4         |
| 48           | Lepidoptera | Nymphalidae   | <i>Melanargia galathea</i>      | 5          | 3         |
| 49           | Coleoptera  | Mordellidae   | Mordellidae <i>sp</i>           | 7          | 4         |
| 50           | Diptera     | Muscidae      | Muscidae <i>sp1</i>             | 1          | 1         |
| 51           | Diptera     | Muscidae      | Muscidae <i>sp2</i>             | 1          | 1         |
| 52           | Hemiptera   | Nabidae       | <i>Nabis sp.</i>                | 1          | 1         |
| 53           | Lepidoptera | Hesperiidae   | <i>Ochlodes sylvanus</i>        | 6          | 5         |
| 54           | Coleoptera  | Oedemeridae   | <i>Oedemera flavipes</i>        | 7          | 5         |
| 55           | Coleoptera  | Oedemeridae   | <i>Oedemera nobilis</i>         | 1          | 1         |
| 56           | Coleoptera  | Oedemeridae   | <i>Oedemera podagrariae</i>     | 13         | 5         |
| 57           | Coleoptera  | Scarabaeidae  | <i>Oxythyrea funesta</i>        | 2          | 2         |
| 58           | Coleoptera  | Cerambycidae  | <i>Paracorymbia fulva</i>       | 1          | 1         |
| 59           | Lepidoptera | Lycaenidae    | <i>Plebejus argus</i>           | 4          | 2         |
| 60           | Coleoptera  | Buprestidae   | <i>Poecilonota variolosa</i>    | 1          | 1         |
| 61           | Coleoptera  | Cantharidae   | <i>Ragonycha fulva</i>          | 6          | 1         |
| 62           | Diptera     | Syrphidae     | <i>Scaeva sp.</i>               | 2          | 1         |
| 63           | Diptera     | Syrphidae     | <i>Sphaerophoria scripta</i>    | 42         | 14        |
| 64           | Diptera     | Syrphidae     | <i>Syritta pipiens</i>          | 1          | 1         |
| 65           | Diptera     | Syrphidae     | Syrphidae <i>sp1</i>            | 1          | 1         |
| 66           | Diptera     | Syrphidae     | Syrphidae <i>sp2</i>            | 3          | 2         |
| 67           | Diptera     | Syrphidae     | Syrphidae <i>sp7</i>            | 1          | 1         |
| 68           | Diptera     | Syrphidae     | Syrphidae <i>sp8</i>            | 1          | 1         |
| 69           | Diptera     | Syrphidae     | Syrphidae <i>sp9</i>            | 5          | 1         |
| 70           | Diptera     | Syrphidae     | Syrphidae <i>sp10</i>           | 1          | 1         |
| 71           | Diptera     | Syrphidae     | Syrphidae <i>sp11</i>           | 1          | 1         |
| 72           | Diptera     | Syrphidae     | <i>Syrphus sp.</i>              | 2          | 1         |
| 73           | Diptera     | Tachinidae    | Tachinidae <i>sp</i>            | 2          | 1         |
| <b>Total</b> |             |               |                                 | <b>879</b> | <b>25</b> |

**Table S3.** Results of multi-model inference based on corrected Akaike Information Criterion (AICc), carried out through generalized linear models to detect the effects of landscape composition and configuration on plant and pollinators richness and on seven network descriptors. Average standardized coefficient ( $\beta$ ),  $\pm$  standard error, of predictors from models with  $\Delta AICc < 2$  and relative importance from Akaike weights (W) are shown.

| Response variable       | N°<br>models<br>$\Delta < 2$ | Predictor variables                    | Estimate ( $\beta$ ) | S.E. | P       | W     |
|-------------------------|------------------------------|----------------------------------------|----------------------|------|---------|-------|
| <b>Inter_poll (N)</b>   | 1                            | (Intercept)                            | 10.33                | 0.32 | <0.0001 | -     |
|                         |                              | Shrublands                             | 2.49                 | 0.53 | <0.0001 | 20    |
|                         |                              | Woodlands                              | -10.6                | 1.16 | <0.0001 | 20    |
|                         |                              | Near distance to not6510habitats       | -3.33                | 0.38 | <0.0001 | 20    |
|                         |                              | Wooded meadows                         | -10.31               | 1.2  | <0.0001 | 20    |
|                         |                              | Croplands                              | -17.21               | 1.68 | <0.0001 | 20    |
| <b>Plants (N)</b>       | 1                            | (Intercept)                            | 13.22                | 0.13 | <0.0001 | -     |
|                         |                              | Shrublands                             | 2.61                 | 0.21 | <0.0001 | 20    |
|                         |                              | Agricultural and Livestock settlements | 1.16                 | 0.26 | <0.0001 | 20    |
|                         |                              | Patches size                           | 0.8                  | 0.2  | <0.0001 | 20    |
|                         |                              | Wooded meadows                         | -1.57                | 0.23 | <0.0001 | 20    |
|                         |                              | Croplands                              | -4.33                | 0.3  | <0.0001 | 20    |
| <b>Inter_plants (%)</b> | 1                            | (Intercept)                            | 0.52                 | 0.01 | <0.0001 | -     |
|                         |                              | Shrublands                             | 0.03                 | 0.01 | <0.0001 | 16.66 |
|                         |                              | Woodlands                              | -0.34                | 0.03 | <0.0001 | 16.66 |
|                         |                              | Agricultural and Livestock settlements | -0.13                | 0.02 | <0.0001 | 16.66 |
|                         |                              | Patches size                           | -0.09                | 0.01 | <0.0001 | 16.66 |
|                         |                              | Wooded meadows                         | -0.27                | 0.03 | <0.0001 | 16.66 |
|                         |                              | Croplands                              | -0.4                 | 0.03 | <0.0001 | 16.66 |
| <b>C</b>                | 9                            | (Intercept)                            | -3.67                | 1.31 | <0.0001 | -     |
|                         |                              | Rocks                                  | -3.01                | 1.38 | <0.0001 | 12.58 |
|                         |                              | Near distance to 6510habitats          | 5.35                 | 3.91 | 0.18    | 17.3  |
|                         |                              | Open meadows                           | 2.86                 | 1.4  | 0.06    | 9.87  |
|                         |                              | Arid croplands                         | -2.83                | 1.4  | 0.06    | 9.32  |
|                         |                              | Croplands                              | -2.73                | 1.42 | 0.08    | 7.95  |
|                         |                              | Human settlements                      | -2.71                | 1.42 | 0.08    | 7.7   |
|                         |                              | Wooded meadows                         | 2.7                  | 1.42 | 0.08    | 7.61  |
|                         |                              | Agricultural and Livestock settlements | 8.96                 | 3.83 | <0.0001 | 6.15  |
|                         |                              | Patches size                           | 8.44                 | 3.62 | <0.0001 | 6.15  |
| <b>Nestedness</b>       | 4                            | (Intercept)                            | 0.34                 | 0.5  | 0.54    | -     |
|                         |                              | Woodlands                              | 5.43                 | 4.46 | 0.23    | 18.66 |
|                         |                              | Agricultural and Livestock settlements | 4.86                 | 1.76 | <0.0001 | 23.95 |
|                         |                              | Wooded meadows                         | 8                    | 3.59 | <0.0001 | 20.28 |
|                         |                              | Croplands                              | 6.98                 | 2.7  | <0.0001 | 15    |
|                         |                              | Shrublands                             | -1.59                | 0.76 | 0.06    | 9.5   |
|                         |                              | Human settlements                      | -2.69                | 0.75 | <0.0001 | 5.29  |

|           |   |                                        |        |      |         |       |
|-----------|---|----------------------------------------|--------|------|---------|-------|
|           |   | Patches size                           | 7.28   | 1.7  | <0.0001 | 3.67  |
|           |   | Near distance to 6510habitats          | 9.13   | 1.5  | <0.0001 | 3.67  |
| <b>E2</b> | 7 | (Intercept)                            | -15.96 | 5.04 | <0.0001 | -     |
|           |   | Rocks                                  | -13.65 | 5.24 | <0.0001 | 32.42 |
|           |   | Arid croplands                         | -12.17 | 5.4  | <0.0001 | 12.6  |
|           |   | Croplands                              | -12.04 | 5.42 | <0.0001 | 11.86 |
|           |   | Open meadows                           | 11.6   | 5.48 | 0.04    | 9.76  |
|           |   | Near distance to not6510habitats       | -5.87  | 5.25 | 0.3     | 8.97  |
|           |   | Human settlements                      | -11.4  | 5.51 | 0.06    | 8.93  |
| <b>H2</b> | 8 | (Intercept)                            | 0.83   | 0.02 | <0.0001 | -     |
|           |   | Near distance to not6510habitats       | 0.07   | 0.02 | <0.0001 | 36.97 |
|           |   | Open meadows                           | 0.07   | 0.02 | <0.0001 | 6.38  |
|           |   | Wooded meadows                         | 0.07   | 0.03 | <0.0001 | 27.94 |
|           |   | Woodlands                              | 0.04   | 0.02 | 0.11    | 10.21 |
|           |   | Human settlements                      | -0.03  | 0.02 | 0.15    | 4.73  |
|           |   | Rocks                                  | 0.05   | 0.03 | 0.16    | 4.18  |
|           |   | Croplands                              | -0.03  | 0.02 | 0.21    | 3.65  |
|           |   | Shannon diversity index of habitats    | -0.02  | 0.02 | 0.23    | 3.29  |
|           |   | Arid croplands                         | -0.06  | 0.02 | <0.0001 | 2.65  |
| <b>HL</b> | 2 | (Intercept)                            | -10.27 | 2.32 | <0.0001 | -     |
|           |   | Agricultural and Livestock settlements | 27.53  | 7.96 | <0.0001 | 30.24 |
|           |   | Patches size                           | 29.61  | 7.98 | <0.0001 | 30.24 |
|           |   | Near distance to 6510habitats          | 29.79  | 6.96 | <0.0001 | 30.24 |
|           |   | Woodlands                              | -4.02  | 3.36 | 0.26    | 9.27  |
| <b>LL</b> | 2 | (Intercept)                            | -9.6   | 2.48 | <0.0001 | -     |
|           |   | Agricultural and Livestock settlements | 29.18  | 8.73 | <0.0001 | 29.23 |
|           |   | Patches size                           | 30.9   | 8.99 | <0.0001 | 29.23 |
|           |   | Near distance to 6510habitats          | 32.08  | 7.88 | <0.0001 | 29.23 |
|           |   | Woodlands                              | -5.39  | 3.54 | 0.15    | 12.3  |
